# Supplementary material for: Maternal Smoking during Pregnancy and Necrotizing Enterocolitis-associated Infant Mortality in Preterm Babies
Source: PubMed Central journal article supplement (PMC5374458; doi:10.1038/srep45784), 2017-03-31
Supplement: srep45784-s1.pdf [file srep45784-s1.pdf]

# Maternal Smoking during Pregnancy and Necrotizing Enterocolitis-associated Infant Mortality in Preterm Babies

Guodong Ding<sup>1,2 #</sup>, Jing Yu<sup>3#</sup>, Yan Chen<sup>1#</sup>, Angela Vinturache<sup>4</sup>, Yu Pang<sup>5</sup>, Jun Zhang<sup>1\*</sup>

<sup>1</sup>MOE and Shanghai Key Laboratory of Children's Environmental Health, Xinhua Hospital, Shanghai Jiao Tong University School of Medicine, Shanghai 200092, China

<sup>2</sup>Department of Pediatrics, Shanghai East Hospital, Tongji University School of Medicine, Shanghai 200120, China

<sup>3</sup>Department of Endocrinology and Metabolism, Shanghai Jiao Tong University Affiliated Sixth People's Hospital, Shanghai 200233, China

<sup>4</sup>Department of Obstetrics & Gynaecology, John Radcliffe Hospital, Oxford University Hospital Trust, Headley Way, Oxford, OX3 9DU, UK

<sup>5</sup>China Novartis Institutes for BioMedical Research Co., Ltd, Shanghai 201203, China

---

<sup>#</sup>Guodong Ding, Jing Yu, and Yan Chen contributed equally to this work.

<sup>\*</sup>Address correspondence to: Dr. Jun Zhang, MOE and Shanghai Key Laboratory of Children's Environmental Health, Xinhua Hospital, Shanghai Jiao Tong University School of Medicine, 1665 Kongjiang Road, 200092 Shanghai, China. Tel.: +86 21 25078871; fax: +86 21 25078875.

E-mail addresses:

[dingguodong204296@126.com](mailto:dingguodong204296@126.com) (Guodong Ding), [yujing\\_tj@163.com](mailto:yujing_tj@163.com) (Jing Yu),

[chenyan783563@163.com](mailto:chenyan783563@163.com) (Yan Chen), [angela.vinturache@doctors.org.uk](mailto:angela.vinturache@doctors.org.uk) (Angela Vinturache),

[pangyu911@126.com](mailto:pangyu911@126.com) (Yu Pang), [junjimzhang@sina.com](mailto:junjimzhang@sina.com) (Jun Zhang).

**Supplementary Table 1.** Comparison of the characteristics of non-smoking and smoking mothers with singleton, preterm pregnancies, Birth and Infant Death Cohort, 2000–2004\*

| Characteristic                          | Non-smoking mothers<br>(n= 1,143,397) | Smoking mothers<br>(n= 172,096) |
|-----------------------------------------|---------------------------------------|---------------------------------|
| <b>Maternal age, y</b>                  |                                       |                                 |
| ≤ 19                                    | 148,967 (13.0%)                       | 26,384(15.3%)                   |
| 20–34                                   | 826,412 (72.3%)                       | 124,287 (72.2%)                 |
| ≥ 35                                    | 168,018 (14.7%)                       | 21,425 (12.5%)                  |
| <b>Maternal race/ethnicity</b>          |                                       |                                 |
| Non-Hispanic White                      | 605,295 (52.9%)                       | 129,477 (75.2%)                 |
| Hispanic                                | 216,019 (18.9%)                       | 8,533 (5.0%)                    |
| Non-Hispanic Black                      | 275,061 (24.1%)                       | 32,273 (18.8%)                  |
| Asian                                   | 47,022 (4.1%)                         | 1,813 (1.1%)                    |
| <b>Maternal education, y</b>            |                                       |                                 |
| < 12 (Less than high school)            | 242,631 (21.2%)                       | 66,961 (38.9%)                  |
| = 12 (High school)                      | 366,560 (32.1%)                       | 72,054 (41.9%)                  |
| 13–16 (College)                         | 427,653 (37.4%)                       | 31,522 (18.3%)                  |
| ≥ 17 (Graduate school)                  | 106,553 (9.3%)                        | 1,559 (0.9%)                    |
| <b>Maternal marital status</b>          |                                       |                                 |
| Married                                 | 712,151 (62.3%)                       | 67,235 (39.1%)                  |
| Unmarried                               | 431,246 (37.7%)                       | 104,861 (60.9%)                 |
| <b>Month that prenatal care started</b> |                                       |                                 |
| 1st Trimester                           | 940,526 (82.3%)                       | 121,886 (70.8%)                 |
| 2nd Trimester                           | 146,126 (12.8%)                       | 32,354 (18.8%)                  |
| 3rd Trimester                           | 29,642 (2.6%)                         | 7,357 (4.3%)                    |
| No prenatal care                        | 27,103 (2.4%)                         | 10,499 (6.1%)                   |
| <b>Gestational period ,wk</b>           |                                       |                                 |
| 24–26                                   | 34,248 (3.0%)                         | 5,334 (3.1%)                    |
| 27–29                                   | 50,134 (4.4%)                         | 8,231 (4.8%)                    |
| 30–32                                   | 106,208 (9.3%)                        | 17,846 (10.4%)                  |
| 33–36                                   | 952,807 (83.3%)                       | 140,685 (81.8%)                 |
| <b>Infant sex</b>                       |                                       |                                 |
| Male                                    | 616,626 (53.9%)                       | 91,985 (53.5%)                  |
| Female                                  | 526,771 (46.1%)                       | 80,111 (46.6%)                  |
| <b>Birthweight, g</b>                   |                                       |                                 |
| <750                                    | 20,858 (1.8%)                         | 3,101 (1.8%)                    |
| 750–999                                 | 29,002 (2.5%)                         | 4,756 (2.8%)                    |
| 1000–1499                               | 66,825 (5.8%)                         | 11,866 (6.9%)                   |
| 1500–1999                               | 120,185 (10.5%)                       | 23,005 (13.4%)                  |
| 2000–2499                               | 257,715 (22.5%)                       | 49,893 (29.0%)                  |
| ≥ 2500                                  | 648,812 (56.7%)                       | 79,475 (46.2%)                  |

\*All differences between smoking and non-smoking mothers were statistically significant at  $p < 0.001$ .

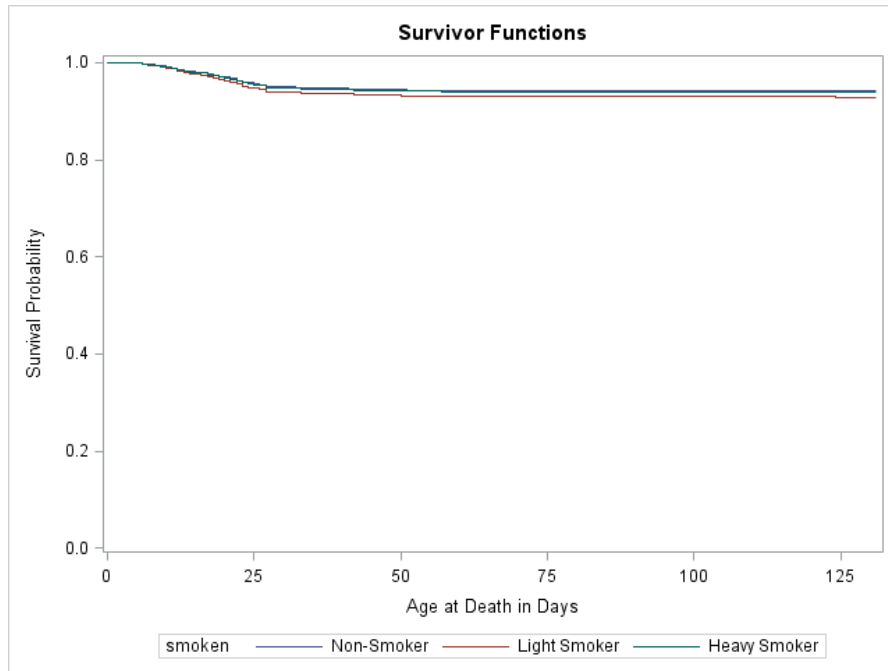

**Supplementary figure 1.** Survival curves among the nonsmokers, light smokers, and heavy smokers in white race

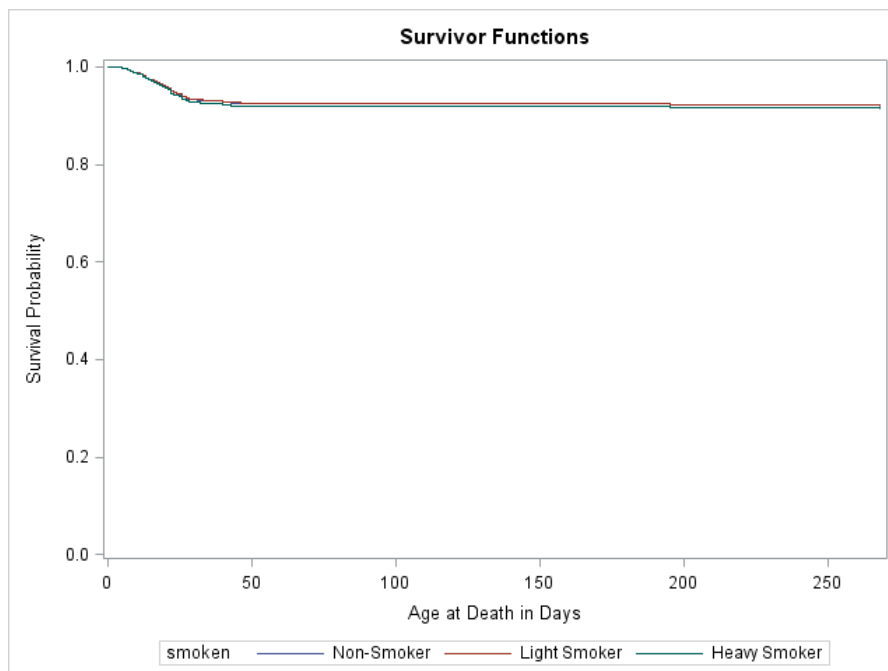

**Supplementary figure 2.** Survival curves among the nonsmokers, light smokers, and heavy smokers in female gender
